# Supplementary material
Source: Elsevier journal article supplement (https://www.sciencedirect.com/science/article/pii/S0001651920301461)

**Material suplementario.**

**Tabla 1.** Mediana del valor de expresión transcripcional de la IL8 en función de las características de los pacientes incluidos en el estudio.

|  | | **Mediana IL8** | **P** |
| --- | --- | --- | --- |
| **Sexo** | Masculino | 488,3 | 0,405 |
| Femenino | 384,9 |
| **Localización** | Cavidad oral | 1176,7 | 0,184 |
| Orofaringe | 411,1 |
| Hipofaringe | 554,1 |
| Laringe | 430,8 |
| **Tóxicos** | No | 1655,0 | 0,093 |
| Moderado | 303,1 |
| Severo | 456,9 |
| **Extensión local** | T1-2 | 352,0 | 0,203 |
| T3-4 | 768,0 |
| **Extensión regional** | N0 | 736,6 | 0,137 |
| N+ | 361,4 |
| **Estadio** | I-II | 469,9 | 0,915 |
| III-IV | 475,3 |
| **Grado histológico** | Bien diferenciado | 1560,0 | 0,319 |
| Mod. diferenciado | 438,4 |
| Mal diferenciado | 173,3 |
| **Tratamiento** | Radioterapia | 620,9 | 0,132 |
| Quimio-radioterapia | 360,6 |

**Figura 1.** Expresión transcripcional de la IL-8 en el tumor dependiendo del control local tras el tratamiento con radioterapia o quimio-radioterapia en función de la localización del tumor primario.


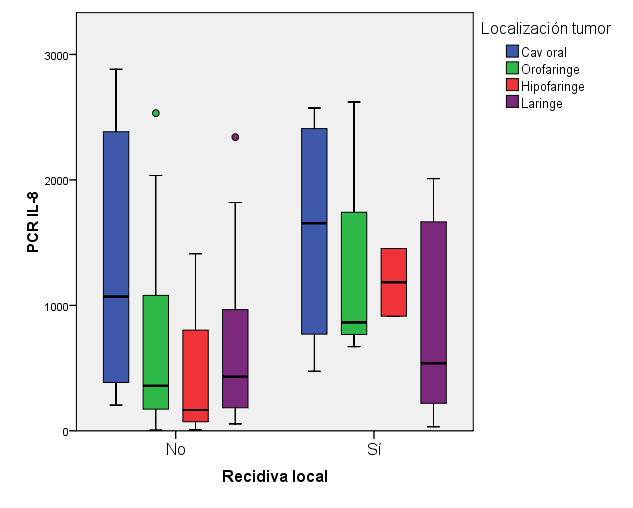

Supplement: mmc1 [file S0001651920301461:mmc1.doc]
